# Supplementary material for: A novel G·G·T non-conventional intramolecular triplex formed by the double repeat sequence of Chlamydomonas telomeric DNA
Source: Royal Society of Chemistry journal article supplement (doi:10.1039/d2ra00861k), 2022-01-01
Supplement: d2ra00861k1.pdf [file d2ra00861k1.pdf]

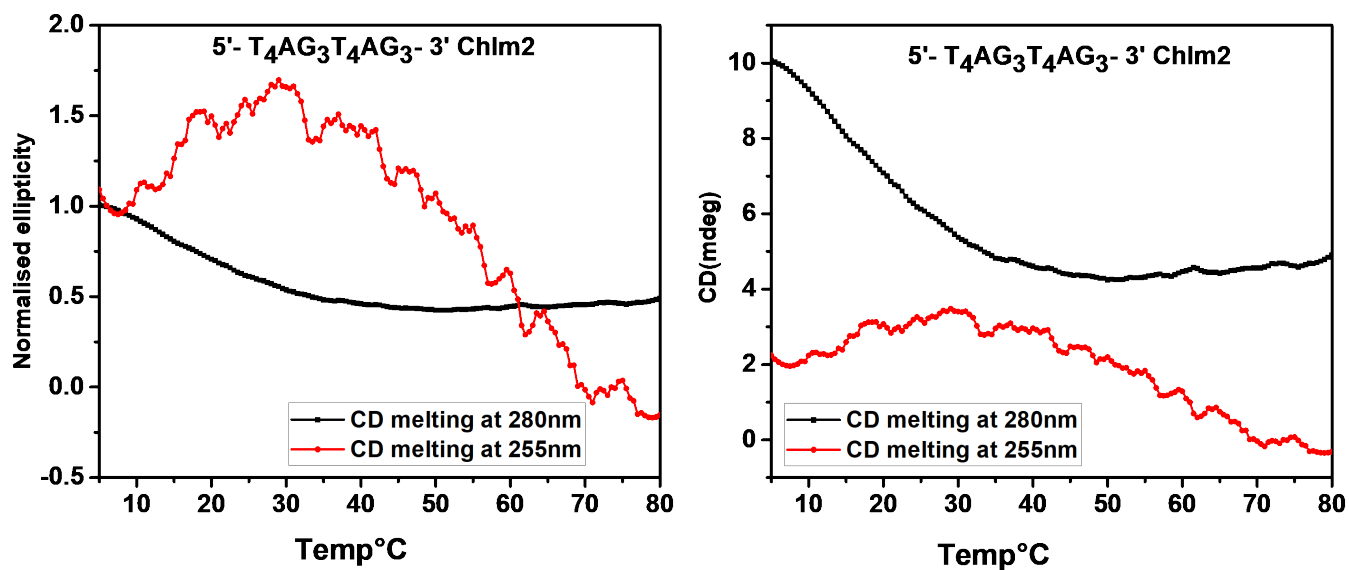

Supplementary Figure 1(S1): CD melting profile of  $(T_4AG_3)_2$  [Chlm2] at  $10\mu\text{M}$  strand concentration in 20mM sodium cacodylate (pH 7.4), 0.1mM EDTA containing 0.1M NaCl at 280nm and 255nm.

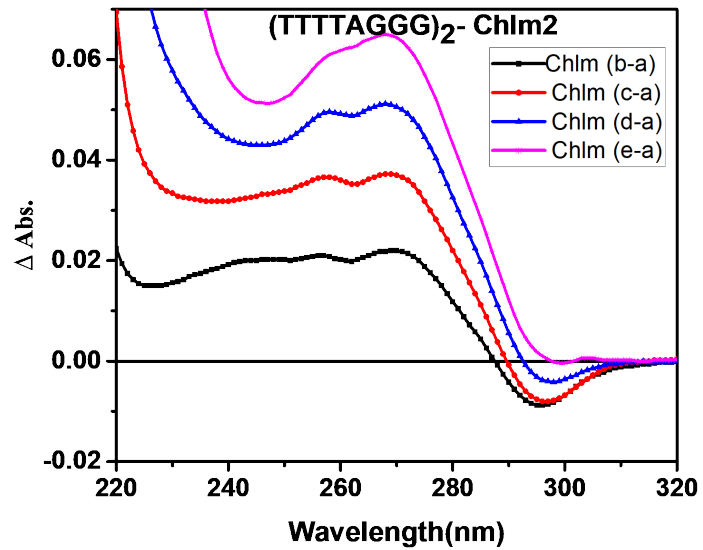

Supplementary Figure 2(S2): Differential absorbance spectra of Chlm2 obtained as a result of arithmetic difference between high and low temperature absorbance spectra where a=20°C, b= 40°C, c=60°C, d=80°C, e= 100°C

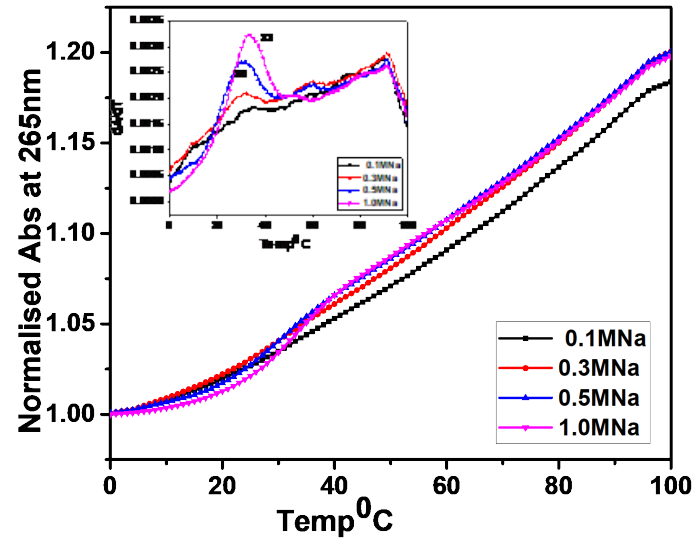

Supplementary Figure 3(S3): Thermal denaturation profile of  $(T_4AG_3)_2$  [Chlm2] at 5  $\mu$ M strand concentration in 20mM sodium cacodylate (pH 7.4), 0.1mM EDTA containing (—■—) 0.1M, (— $\circ$ —) 0.3M, (—\*—) 0.5M and ((— $\blacktriangledown$ —)) 1M NaCl, monitored at 265nm
